# Supplementary material
Source: PubMed Central journal article supplement (PMC8054779)
Supplement: NIHMS1645280-supplement-13.pdf [file NIHMS1645280-supplement-13.pdf]

# Supplemental Figures

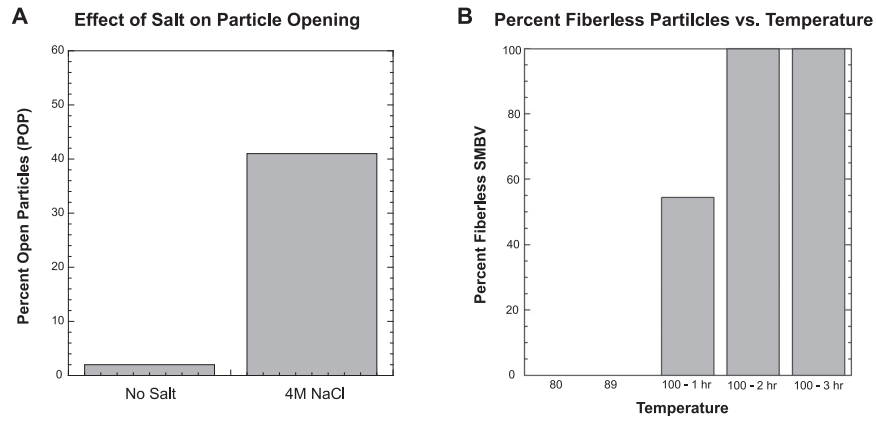

**Figure S1. Percentage of Fiberless SMBV Particles at Varying Temperatures, Related to Figure 1**

A) Histogram of the percentage of open SMBV particles after treatment with salt. B) Histogram of the percentage of fiberless (open or unopen) SMBV particles at various temperatures and incubation times.

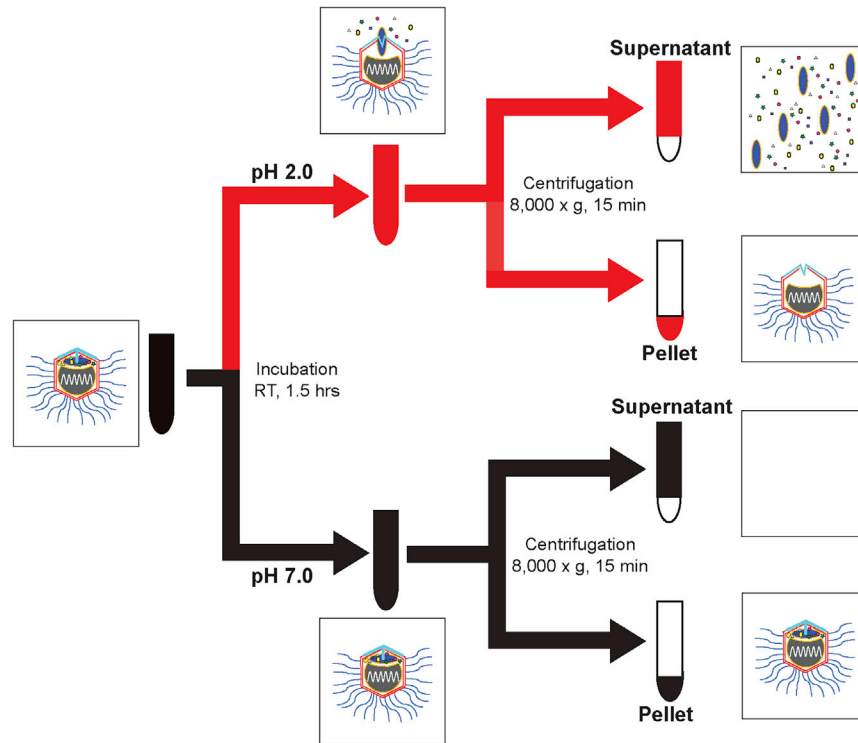

**Figure S2. Sample Preparation for SDS-PAGE and LC/MS/MS Experiments, Related to Figures 4 and 5**  
A cartoon of the workflow schematic used to prepare samples for both the SDS-PAGE and LC/MS/MS experiments.
