# Supplementary material
Source: PubMed Central journal article supplement (PMC8054779)
Supplement: NIHMS1645280-supplement-Supplementary_table_1.pdf [file NIHMS1645280-supplement-Supplementary_table_1.pdf]

Supplemental Table 1: **Conditions That SMBV Particles Resist. Related to Figure 1.**  
 Treatment conditions that did not produce a marked increase in the percentage of open SMBV particles.

Table S1

| <b>Condition</b>                     | <b>Concentration(s)</b> | <b>% Open SMBV</b> |
|--------------------------------------|-------------------------|--------------------|
| Urea                                 | 9M                      | 2.94               |
| Guanidinium Hydrochloride            | 3M, 6M                  | 2.90               |
| DMSO                                 | 1% (v/v)                | 2.00               |
| Triton X-100                         | 1% (v/v)                | 0.00               |
| Bromelain, Proteinase K,<br>Lysozyme | 14, 1, 10 mg/mL         | 0.00               |
| Chloroform                           | 20% (v/v)               | 4.17               |
| DNase I                              | 2 mg/mL                 | 2.33               |
