# Supplementary material
Source: PubMed Central journal article supplement (PMC8054779)

**A)**

**Effect of Salt on Particle Opening**

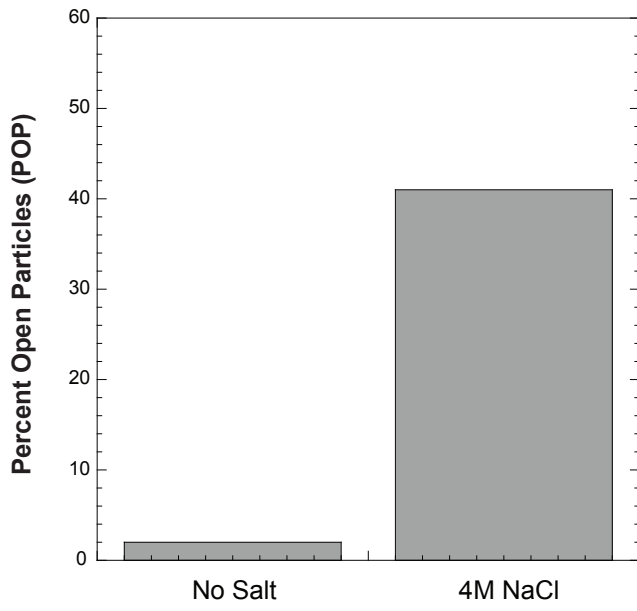

**B)**

**Percent Fiberless Particles vs. Temperature**

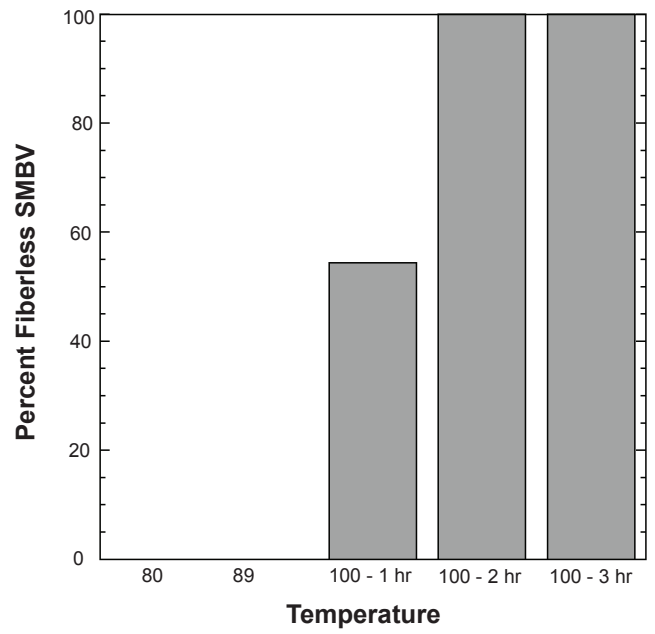

Supplement: NIHMS1645280-supplement-Supplementary_Figure_1.pdf [file NIHMS1645280-supplement-Supplementary_Figure_1.pdf]
